# Next Generation Sequencing Based Transcriptome Analysis of Septic-Injury Responsive Genes in the Beetle *Tribolium castaneum*

Boran Altincicek<sup>1\*</sup>, Abdelnaser Elashry<sup>1</sup>, Nurper Guz<sup>2</sup>, Florian M. W. Grundler<sup>1</sup>, Andreas Vilcinskas<sup>3</sup>, Heinz-Wilhelm Dehne<sup>1</sup>

**1** Rheinische Friedrich-Wilhelms-University of Bonn, INRES-Phytomedicine, Nussallee 9, Bonn, Germany, **2** Department of Plant Protection, Faculty of Agriculture, Ankara University, Ankara, Turkey, **3** Justus-Liebig-University of Giessen, Institute of Phytopathology and Applied Zoology, Giessen, Germany

## Abstract

Beetles (Coleoptera) are the most diverse animal group on earth and interact with numerous symbiotic or pathogenic microbes in their environments. The red flour beetle *Tribolium castaneum* is a genetically tractable model beetle species and its whole genome sequence has recently been determined. To advance our understanding of the molecular basis of beetle immunity here we analyzed the whole transcriptome of *T. castaneum* by high-throughput next generation sequencing technology. Here, we demonstrate that the Illumina/Solexa sequencing approach of cDNA samples from *T. castaneum* including over 9.7 million reads with 72 base pairs (bp) length (approximately 700 million bp sequence information with about 30× transcriptome coverage) confirms the expression of most predicted genes and enabled subsequent qualitative and quantitative transcriptome analysis. This approach recapitulates our recent quantitative real-time PCR studies of immune-challenged and naïve *T. castaneum* beetles, validating our approach. Furthermore, this sequencing analysis resulted in the identification of 73 differentially expressed genes upon immune-challenge with statistical significance by comparing expression data to calculated values derived by fitting to generalized linear models. We identified up regulation of diverse immune-related genes (e.g. Toll receptor, serine proteinases, DOPA decarboxylase and thaumatin) and of numerous genes encoding proteins with yet unknown functions. Of note, septic-injury resulted also in the elevated expression of genes encoding heat-shock proteins or cytochrome P450s supporting the view that there is crosstalk between immune and stress responses in *T. castaneum*. The present study provides a first comprehensive overview of septic-injury responsive genes in *T. castaneum* beetles. Identified genes advance our understanding of *T. castaneum* specific gene expression alteration upon immune-challenge in particular and may help to understand beetle immunity in general.

**Citation:** Altincicek B, Elashry A, Guz N, Grundler FMW, Vilcinskas A, et al. (2013) Next Generation Sequencing Based Transcriptome Analysis of Septic-Injury Responsive Genes in the Beetle *Tribolium castaneum*. PLoS ONE 8(1): e52004. doi:10.1371/journal.pone.0052004

**Editor:** Leonardo Mariño-Ramírez, National Institutes of Health, United States of America

**Received:** September 24, 2012; **Accepted:** November 7, 2012; **Published:** January 9, 2013

**Copyright:** © 2013 Altincicek et al. This is an open-access article distributed under the terms of the Creative Commons Attribution License, which permits unrestricted use, distribution, and reproduction in any medium, provided the original author and source are credited.

**Funding:** The authors acknowledge support by the German Research Foundation (Deutsche Forschungsgemeinschaft, DFG) with a Heisenberg-fellowship to BA (AL902/4-1), a research grant to BA and AV (AL902/2-1), by the University of Bonn (Landwirtschaftliche Fakultät) with a start-up fund to BA and by the excellence initiative of the Hessian Ministry of Science and Art, which encompasses a generous grant for the LOEWE research focus "Insect Biotechnology" to AV. The funders had no role in study design, data collection and analysis, decision to publish, or preparation of the manuscript.

**Competing Interests:** The authors have declared that no competing interests exist.

\* E-mail: boran.altincicek@uni-bonn.de

## Introduction

Parasites reduce the fitness of their hosts and therefore numerous host mechanisms have evolved to limit infectious diseases. In animals, the risk of an infection is reduced by physical and chemical barriers, by behavioral defense reactions such as avoidance or hygiene [1], and by the complex and highly evolved immune defense system. In vertebrates, the immune system is composed of the adaptive immunity including specific T-cell receptors and B-cell-derived antibodies and the evolutionarily more ancient innate immunity [2,3]. Of note, vertebrate innate immunity shows many parallels to the invertebrate immunity. Insects, e.g. *Drosophila melanogaster*, have widely been used to elucidate invertebrate immune reactions. These reactions include entrapment of invading pathogens in clots, phagocytosis by immune-competent cells (hemocytes), and the induced production of antimicrobial peptides as well as reactive oxygen species, both

underlying the induced expression of a wide array of immune-related genes [4–9].

The recent determination of the *Tribolium castaneum* genome sequence [10] enabled the identification of numerous immune-related genes by both homology-based [11] and experimental approaches [12]. These studies provided first important insights into the *T. castaneum* immunity; however, our understanding of *Tribolium* immune responses is still fragmentary. The expression levels of only a limited number of *Tribolium* genes have been determined upon immune-challenge [11,12]. To gain deeper insights into *Tribolium* immune responses, here, we investigated the whole transcriptome of naïve and immune-challenged beetles by Illumina/Solexa next generation sequencing. To induce strong immune responses in *T. castaneum* we used a commercially available crude lipopolysaccharide (LPS) preparation derived from *Escherichia coli*, which has widely been used as an elicitor of immune responses in numerous vertebrates and invertebrate species [12–16].

The present sequencing approach resulted in the identification of the transcriptome of *T. castaneum* and the identification of 70 genes with significantly elevated and 3 genes with reduced mRNA levels upon septic injury as determined by fitting the expression data with generalized linear models.

## Materials and Methods

### Biological samples for transcriptional analysis

The *Tribolium* stock that we used in this study was the *T. castaneum* wild-type strain San Bernardino. In contrast to the genome-sequenced GA-2 *T. castaneum* strain, the strain San Bernardino is “wild-type” since no consecutive generations of virgin single-pair, full-sib inbreeding were performed for 20 generations to obtain near-homozygous inbred condition needed for proper genome-sequencing [10]. Beetles were maintained on whole-grain flour with 5% yeast powder at 31°C in darkness. For the experimental treatments, we have first randomly selected 40 young adult beetles (1–2 weeks after final ecdysis), which were subsequently divided by chance into two groups. LPS-challenge of 20 beetles was performed by ventrolaterally pricking of the imagoes abdomen using a dissecting needle dipped in an aqueous solution of 10 mg/ml lipopolysaccharide (LPS, purified *Escherichia coli* endotoxin 0111:B4, Cat. No.: L2630, Sigma, Taufkirchen, Germany), as described [12]. At eight hours post LPS-challenge treated beetles and a biologically independent sample of 20 unstabbed, but similar handled beetles (control) were frozen in liquid nitrogen. We extracted total RNA from frozen beetles using the TriReagent isolation reagent (Molecular Research Centre, Cincinnati, OH, USA) according to the instructions of the manufacturer and synthesized cDNA samples using oligo-d(T) primers with the SMART PCR cDNA Synthesis Kit (Clontech, Mountain View, CA, USA) as previously described [12]. Sequencing was done by the GATC GmbH (Konstanz, Germany) sequencing company on an Illumina GA2 sequencer.

### Data analysis and bioinformatics

We have deposited the short read sequencing data with the following SRA accession numbers at NCBI sequence database: SRX022010 (immune-challenged beetles) and SRX021963 (naïve beetles). Sequencing reads were mapped by the sequencing company with ELAND Illumina software using the first 32 bp with highest sequencing quality and score values over 30 indicating 99.9% accuracy [17] and allowing one mismatch to the reference sequence of the *Tribolium* genome sequencing [18]. To calculate statistical differences of the expression levels of genes between treatment and control and thereby to identify immune-responsive genes we utilized DESeq package [19] within Bioconductor [20] and R [21]. DESeq was used to normalize the count data, calculate mean values, fold changes, size factors, variance and P values (raw and adjusted) of a test for differential gene expression based on generalized linear models using negative binomial distribution errors.

### Identification of Single Nucleotide Polymorphisms (SNPs) and Deletion Insertion Polymorphisms (DIPs) and *de novo* assembly

Single Nucleotide Polymorphisms (SNPs) and Deletion Insertion Polymorphisms (DIPs) detection tools within the CLC genomic workbench (version 4.9) were used to determine sequence variants. First, all Illumina reads were prepared by trimming of ambiguous nucleotides ( $>2 N$ ) and low quality bases ( $<0.05$ ). First we mapped all reads against the Glean assembly transcripts. Then, the level of SNPs and DIPs quality and significance was assessed by adjusting

the quality filter to select only SNPs and DIPs that exists in a window of at least 11 bases and does not score more than 2 gaps or mismatches. The quality of the central base of each window was set to be at least 20 and the surrounding bases at least 15. The significance filter was adjusted to ignore SNPs and DIPs that have a coverage less than 4 and variant level less than 35% of corresponding reads. *De novo* assembly has been performed with the CLC genomics workbench (version 4.9) with the *de novo* assembly algorithm for Illumina reads with default parameters settings (Min. similarity allowed = 0.8 at length fraction = 0.5, deletion and insertion cost = 3, and mismatch cost = 2).

### Sequence annotation

Sequence homology searches of predicted reference gene sequences (gleans) and subsequent functional annotation by gene ontology terms (GO), InterPro terms (InterProScan, EBI), enzyme classification codes (EC), and metabolic pathways (KEGG, Kyoto Encyclopedia of Genes and Genomes) were determined using the BLAST2GO software suite v2.3.1 [22]. Homology searches were performed remotely on the NCBI server through QBLAST: sequences were compared with the NCBI non-redundant (nr) protein database and matches with an E-value cut-off of  $10^{-3}$ , with predicted polypeptides of a minimum length of 15 amino acids, were scored. Subsequently, GO classification, including enzyme classification codes and KEGG metabolic pathway annotations, were generated. For final annotation, InterPro searches on the InterProEBI web server were performed remotely by utilizing BLAST2GO.

## Results and Discussion

### Mapping Illumina sequencing reads to predicted gene models of *T. castaneum*

To gain insights into *Tribolium* immune responses, we investigated the whole transcriptome of naïve and immune-challenged beetles by Illumina/Solexa next generation sequencing. This sequencing approach resulted in over 9.7 million cDNA reads with over 700 million bp sequence information and estimated  $30\times$  transcriptome coverage. About 3.8 and 4.0 million reads of Illumina sequencing of control and LPS-challenged animals, respectively, were mapped to predicted gene models of *T. castaneum*, which were built on the 3.0 genome assembly [10] (Table 1). We found that 11,679 predicted genes were expressed in both naïve and LPS-challenged adult *Tribolium* beetles. Additional sequences corresponding to the expression of further 642 and 739 predicted genes in naïve and LPS-challenged beetles, respectively, were also observed. In total, this approach resulted in the expression validation of 13,060 genes, representing almost 80% of the in total 16,422 predicted genes.

### Evidence for the need of gene model curation and identification of single-nucleotide polymorphisms (SNPs) and DIPs (short deletion and insertion polymorphisms)

About 14% of all sequencing reads could be assigned to published *T. castaneum* EST sequences or the genome sequence but not to predicted gene models indicating that several exons or genes might be miss-predicted in the current genome annotation. Therefore, we shared the present sequencing data with the beetleBase [23] and the iBeetle consortium [24], which are currently working on a next, more precise genome annotation. In addition, we identified over 155,000 positions of high quality single-nucleotide polymorphisms (SNPs) and 895 DIPs (short deletion and insertion polymorphisms) within the coding gene

**Table 1.** Summary statistics for *Tribolium castaneum* transcriptome sequencing analysis.

|                                                                           | Illumina sequencing of control animals | Illumina sequencing of LPS-challenged animals |
|---------------------------------------------------------------------------|----------------------------------------|-----------------------------------------------|
| Total number of reads                                                     | 4,626,793                              | 5,120,575                                     |
| Read length (bases)                                                       | 72                                     | 72                                            |
| Reads mapped to predicted gene models                                     | 3,829,729                              | 4,004,894                                     |
| Reads not mapped to predicted gene models but to ESTs or genome sequences | 551,696                                | 814,883                                       |
| Reads not mapped                                                          | 245,368                                | 300,798                                       |

doi:10.1371/journal.pone.0052004.t001

sequences between the *T. castaneum* strain San Bernardino used in the present analysis and the genome-sequenced strain Georgia GA-2 [10] (Table S1). This information might be helpful in future comparative studies investigating the potential impact of SNPs and DIPs on varying ecological traits of diverse *T. castaneum* strains. Furthermore, we performed a *de novo* assembly (Data S1), which might be helpful for future studies investigating e.g. alternative splicing events.

Interestingly, about 5% of all sequencing reads did not map to *T. castaneum* sequences but to sequences from other organisms such as the bacteria *Escherichia coli*, *Bacillus subtilis*, or *Azotobacter vinelandii*. These bacterial species may represent part of the beetle flora.

#### Validation of present Illumina sequencing approach by comparing estimated fold change expression values with recently reported values determined by qRT-PCR analysis

To determine differentially expressed genes between naive and LPS-challenged beetles we first checked whether sequencing samples were comparable. We counted the amount of reads aligned to predicted genes using only the first 32 bp of reads with highest sequencing quality and score values over 30 indicating 99.9% sequence accuracy [17] (Figure S1). In both treatments, we found that almost all genes were expressed at identical levels resulting in a significant linear correlation of the logarithmically transformed expression values (Figure 1). The regression analysis resulted in an adjusted R-squared value of 0.9073 (F,  $1.143 \times 10^5$ ; d.f., 11,677, P,  $< 2.2 \times 10^{-16}$ ). However, as expected, several potentially immune-responsive genes showed variance in their expression levels and we compared their expression rates with recently investigated immune-responsive genes [12]. Validating our present approach, the expression values determined by our recent qRT-PCR analysis of the house-keeping gene  $\alpha$ -tubulin as control and several antimicrobial peptides such as defensins and thaumatin as well as stress-responsive genes such as heat shock factors [12] were found to be comparable to the values determined by the present RNA-Seq approach (Table 2). We found that the values of both experiments were highly similar and correlated with statistical significance (Pearson correlation factor of 0.95 of logarithmically transformed values with a Holm's method adjusted P values = 0) (Figure 2).

#### Identification of significantly induced or repressed genes upon LPS-challenge in *T. castaneum*

To identify novel immune-responsive genes we calculated statistical differences of the expression levels between treatments utilizing DESeq package within Bioconductor and R. This powerful tool estimated the variance in our data and tested for differential gene expression [19]. Since the two biological independent samples from control and treated beetles resulted in

comparable expression values (F,  $1.143 \times 10^5$ ; d.f., 11,677, P,  $< 2.2 \times 10^{-16}$ ), we took the variance estimated from comparing their count rates across conditions as described in the DESeq manual [25]. This analysis to identify differentially expressed genes is appropriate and will only cause the variance estimate to be too high, so that the test will err to the side of being too conservative [25]. We further used pools of 20 individuals per sample to average across biological replicates of individuals. In sum, normalized count data were fitted with a generalized linear model (GLM) estimating a negative binomial distribution to the calculated mean values of the two biologically independent samples with each containing pooled cDNAs of 20 individual beetles. Then the P values were adjusted for multiple testing with the Benjamini-Hochberg procedure, which controls false discovery rate (FDR) (Table S2). Finally, we obtained the statistically significant up-regulation of 70 genes and down-regulation of 3 genes with a 5% FDR (Figure 3).

To assign the potential functions of identified genes we performed an annotation step with blast2go (Table S3) and summarized differentially expressed genes (Table 3). We observed the strongly induced expression of numerous genes including specific serine proteases, Toll receptor, or cathepsin L that are reportedly immune-responsive also in *Drosophila* flies [6,26]. Moreover, we found several genes encoding proteins with leucine-rich-repeat domains potentially involved in immune signaling reactions in *Tribolium*, which have not been investigated yet. The leucine-rich repeat domain is a common structural motif for the molecular recognition of microbes, which is also present in the prominent Toll-like receptors, evolutionarily conserved receptors initiating signaling reactions in animal immunity [2].

Of note, we found that several genes encoding proteins with haemolymph juvenile hormone binding domains were significantly induced (e.g. Glean 09776 and 09775) while expression of a paralogous gene was significantly reduced (Glean 13657) upon immune-challenge. These homologous genes may regulate beetle developmental processes by influencing hormone levels. In agreement with this assumption, recent studies described significantly elevated metamorphosis rates [27] or accelerated aging rates [28] in immune-challenged beetles. Two further significantly down-regulated genes encode proteins with one an esterase-domain and the other a heparin-binding domain both with unknown function. A deeper understanding of the molecular regulation of beetle development by immune responses would help to unravel potential ecological traits in *Tribolium* that might be traded-off with immune reactions probably similar as shown for other insects [29–32].

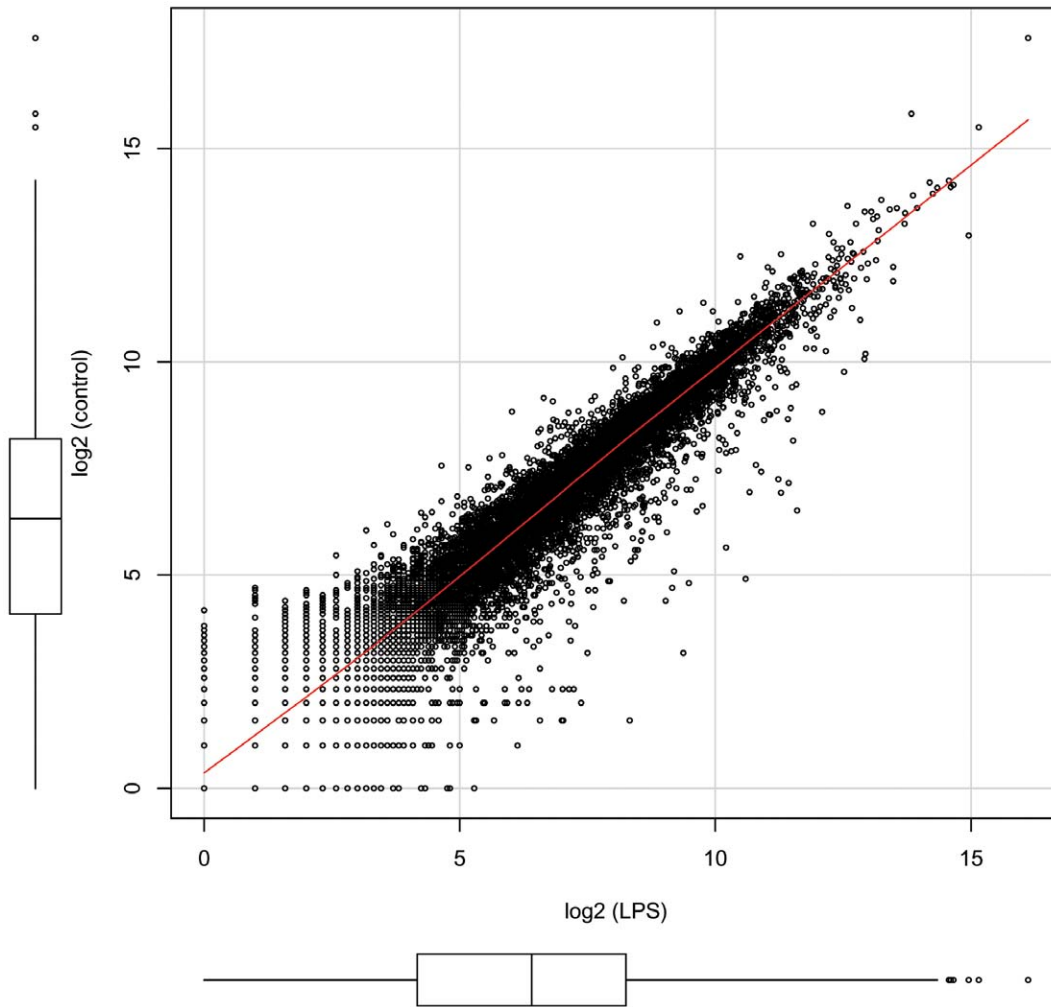

**Figure 1. Gene expression in naive and immune-challenged beetles.** All reads were aligned to predicted genes and are shown as log<sub>2</sub> values derived from cDNA of naive and LPS-challenged animals, respectively. The linear correlation is indicated by a red line (F-test,  $P, <2.2 \times 10^{-16}$ ). doi:10.1371/journal.pone.0052004.g001

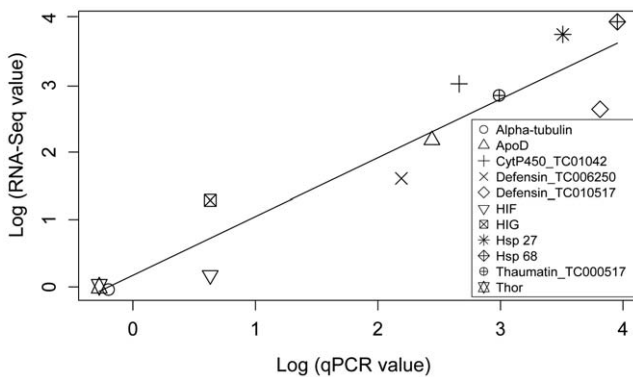

**Figure 2. Correlation of gene expression levels of selected genes by both our recent qRT-PCR [12] and present RNASeq approach.** The determined values of the expression levels of selected genes are shown as log<sub>N</sub> values. The values of both experiments were comparable and correlated with statistical significance (Pearson correlation,  $P, 0$ ). doi:10.1371/journal.pone.0052004.g002

**Expression rates of immune-related genes upon LPS-challenge in *T. castaneum***

The expression rates of numerous immune-related genes showed high induction levels, such as in the case of attacins and defensins (Table 4). However, due to the limitation of the present in-depth sequencing and calculation procedure, we observed statistical significance in immune-induced expression for only a limited number of immune-related genes (Table 3); short gene sequence and low expression rates of e.g. antimicrobial peptides in naive animals resulted in a higher variance estimate and a lower confidence in the base mean estimates. Hence, only genes expressed both at medium or high rate and with at least more than 4 fold expression changes were identified by our approach (Figure 3). Particularly genes encoding antimicrobial peptides such as attacins or defensins are expressed at very low level in unchallenged beetles resulting in a high variance estimate in the present analysis resulting in much lower power of statistical analysis. To identify even more genes with significant expression difference a much higher coverage and more replicate determination per treatment with at least 3-fold deeper sequencing [33] would be needed. However, here we will compare tendencies of

**Table 2.** Comparison of RNA level estimation by our recent qRT-PCR analysis [12] and present transcriptome sequencing approach.

| Gene name               | GLEAN_ID    | Locus tag number_ID | Mean fold change value by qRT-PCR | Mean fold change value by RNA-Seq |
|-------------------------|-------------|---------------------|-----------------------------------|-----------------------------------|
| Alpha-tubulin           | GLEAN_04873 | TcasGA2_TC004873    | 0.82                              | 0.96                              |
| Defensin_TC010517       | GLEAN_10517 | TcasGA2_TC010517    | 45.26                             | 14.00                             |
| Defensin_TC006250       | GLEAN_06250 | TcasGA2_TC006250    | 8.95                              | 5.00                              |
| Thaumatococcus_Tc000517 | GLEAN_00517 | TcasGA2_TC000517    | 19.88                             | 17.18                             |
| ApoD                    | GLEAN_15563 | TcasGA2_TC015563    | 11.48                             | 8.84                              |
| Hsp 68                  | GLEAN_10172 | TcasGA2_TC010172    | 52.12                             | 51.50                             |
| Hsp 27                  | GLEAN_05338 | TcasGA2_TC005338    | 33.42                             | 42.67                             |
| CytP450_TC01042         | GLEAN_10423 | TcasGA2_TC010423    | 14.33                             | 20.43                             |
| Thor                    | GLEAN_06808 | TcasGA2_TC006808    | 0.76                              | 1.01                              |
| HIG                     | GLEAN_03997 | LOC661203           | 1.88                              | 3.62                              |
| HIF                     | GLEAN_13241 | LOC655772           | 1.88                              | 1.19                              |

doi:10.1371/journal.pone.0052004.t002

gene expression changes in immune-challenged *T. castaneum* with reported values of orthologous genes investigated in other insects.

### Molecular pattern recognition proteins

Peptidoglycan recognition proteins (PGRPs) are evolutionarily conserved in animals and have been found to bind specifically to and to hydrolyze bacterial peptidoglycan. In addition, peptidoglycan-bound insect PGRPs activate the Toll and IMD signal transduction pathways as well as immune-related proteolytic

casades [4,5]. Genome-wide gene expression profiling of the *Drosophila* immune-response implied that five PGRP genes including PGRP-SA, SC2, SB1, LB and SD are up regulated upon septic injury [6]. Here, we found that 5 of 7 *Tribolium* genes encoding PGRP- SA, LA, LC, SB, and LB were up regulated in response to LPS injection whereas the expression rates of PGRP-LE and LD were not significantly influenced. In *Drosophila*, PGRP-LD is only expressed in hemocytes and its function is yet unknown

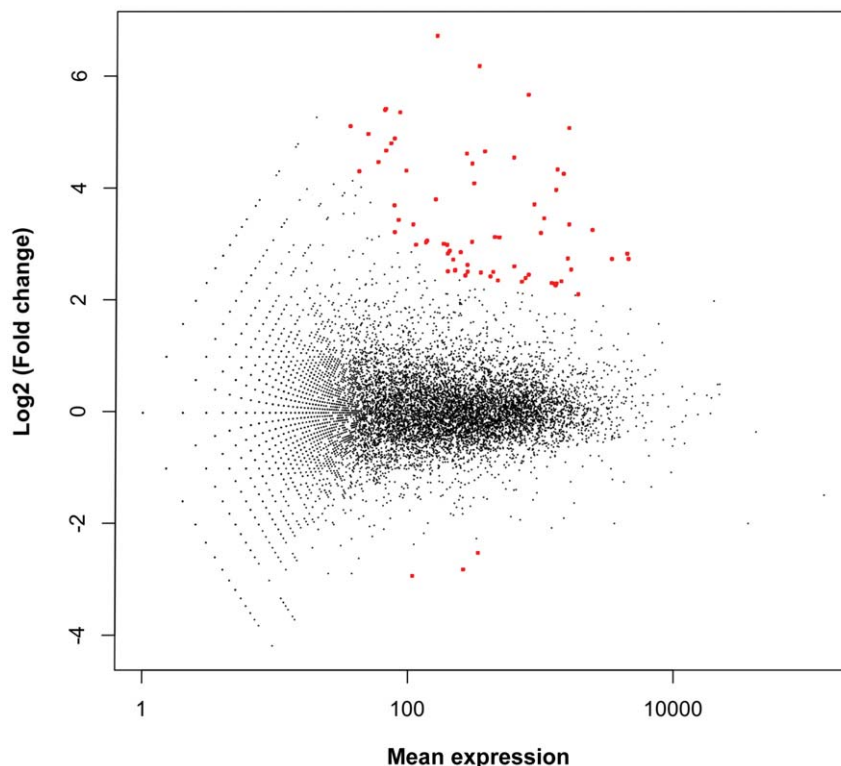

**Figure 3. Significance plot.** The log<sub>2</sub> fold change value of each gene is shown against its base mean value. Differentially expressed genes with statistically significant difference at 5% FDR are indicated by red coloring. doi:10.1371/journal.pone.0052004.g003

**Table 3.** Transcripts with significant differential expression upon LPS-challenge in adult beetles.

| GLEAN_ID    | Description                                                              | Fold change of expression | P value | FDR-adjusted P value |
|-------------|--------------------------------------------------------------------------|---------------------------|---------|----------------------|
| GLEAN_02785 | serine protease P40                                                      | 105.45                    | 0.0000  | 0.0000               |
| GLEAN_09706 | heat shock protein 68a                                                   | 72.49                     | 0.0000  | 0.0000               |
| GLEAN_10172 | similar to heat shock protein 70                                         | 50.75                     | 0.0000  | 0.0000               |
| GLEAN_04540 | hypothetical protein TcasGA2_TC004540                                    | 42.71                     | 0.0000  | 0.0006               |
| GLEAN_05338 | similar to small heat shock protein 21                                   | 42.05                     | 0.0000  | 0.0006               |
| GLEAN_09776 | similar to juvenile hormone-inducible protein with protein kinase domain | 40.90                     | 0.0000  | 0.0001               |
| GLEAN_03541 | similar to lethal(2)essential for life protein, l2efl                    | 34.49                     | 0.0001  | 0.0280               |
| GLEAN_05951 | hypothetical protein TcasGA2_TC005951                                    | 33.64                     | 0.0000  | 0.0000               |
| GLEAN_00067 | similar to putative glutathione s-transferase                            | 31.21                     | 0.0000  | 0.0084               |
| GLEAN_16345 | hypothetical protein TcasGA2_TC016345 with chitin binding domain         | 29.57                     | 0.0000  | 0.0006               |
| GLEAN_09362 | cathepsin L precursor                                                    | 27.79                     | 0.0000  | 0.0010               |
| GLEAN_11793 | similar to annexin IX CG5730-PC                                          | 25.43                     | 0.0000  | 0.0022               |
| GLEAN_13480 | similar to dopa decarboxylase                                            | 25.17                     | 0.0000  | 0.0000               |
| GLEAN_13679 | cytochrome P450-like protein                                             | 24.50                     | 0.0000  | 0.0000               |
| GLEAN_15598 | Major Facilitator Superfamily transport protein                          | 23.30                     | 0.0000  | 0.0000               |
| GLEAN_07154 | Ets-domain transcription factor                                          | 22.08                     | 0.0000  | 0.0083               |
| GLEAN_11632 | similar to inner membrane proteins                                       | 21.64                     | 0.0000  | 0.0000               |
| GLEAN_10423 | cytochrome P450-like protein                                             | 20.13                     | 0.0000  | 0.0000               |
| GLEAN_09775 | similar to Juvenile hormone-inducible protein with protein kinase domain | 19.82                     | 0.0000  | 0.0008               |
| GLEAN_11074 | short peptide                                                            | 19.71                     | 0.0002  | 0.0411               |
| GLEAN_04539 | leucine-rich repeat receptor-like protein kinase                         | 19.06                     | 0.0000  | 0.0000               |
| GLEAN_00517 | similar to antifungal thaumatin-like proteins                            | 16.93                     | 0.0000  | 0.0000               |
| GLEAN_07316 | cytochrome P450 6BQ7                                                     | 15.61                     | 0.0000  | 0.0000               |
| GLEAN_14090 | ABC transporter                                                          | 13.89                     | 0.0000  | 0.0006               |
| GLEAN_03745 | cytochrome P450 345D2                                                    | 13.05                     | 0.0000  | 0.0000               |
| GLEAN_14089 | ABC transporter                                                          | 12.90                     | 0.0001  | 0.0134               |
| GLEAN_00495 | serine protease P8                                                       | 10.99                     | 0.0000  | 0.0000               |
| GLEAN_07952 | Leucine-rich repeats protein                                             | 10.77                     | 0.0001  | 0.0192               |
| GLEAN_14154 | similar to Inter-alpha-trypsin inhibitor heavy chain H4 precursor        | 10.18                     | 0.0000  | 0.0000               |
| GLEAN_06593 | small heat shock protein 21 isoform 1                                    | 10.17                     | 0.0000  | 0.0116               |
| GLEAN_00542 | phosphoserine aminotransferase                                           | 9.51                      | 0.0000  | 0.0001               |
| GLEAN_05026 | Short-chain alcohol dehydrogenase                                        | 9.26                      | 0.0003  | 0.0421               |
| GLEAN_00249 | serine protease H4                                                       | 9.15                      | 0.0000  | 0.0002               |
| GLEAN_15563 | apolipoprotein D                                                         | 8.72                      | 0.0000  | 0.0008               |
| GLEAN_16089 | similar to NRF-6 and NDG-4                                               | 8.67                      | 0.0000  | 0.0007               |
| GLEAN_13326 | serine protease P140                                                     | 8.33                      | 0.0001  | 0.0147               |
| GLEAN_07322 | cytochrome P450 6BQ12                                                    | 8.19                      | 0.0000  | 0.0024               |
| GLEAN_05365 | similar to cytochrome P450 monooxygenase                                 | 8.16                      | 0.0001  | 0.0172               |
| GLEAN_00497 | serine protease P10                                                      | 8.01                      | 0.0000  | 0.0088               |
| GLEAN_10252 | cytochrome P450 6BK5                                                     | 7.92                      | 0.0002  | 0.0280               |
| GLEAN_03029 | Protein Kinase                                                           | 7.91                      | 0.0000  | 0.0087               |
| GLEAN_12641 | Tetraspannin                                                             | 7.35                      | 0.0000  | 0.0116               |
| GLEAN_06793 | similar to small heat shock protein 21                                   | 7.31                      | 0.0000  | 0.0120               |
| GLEAN_13280 | serine protease P139                                                     | 7.22                      | 0.0000  | 0.0088               |
| GLEAN_05669 | Leucine rich repeat protein                                              | 7.10                      | 0.0000  | 0.0008               |
| GLEAN_15550 | similar to cytochrome P450 monooxygenase                                 | 7.08                      | 0.0001  | 0.0149               |
| GLEAN_02431 | similar to Ofd1 protein                                                  | 6.68                      | 0.0000  | 0.0019               |



Table 3. Cont.

| GLEAN_ID    | Description                                                                               | Fold change of expression | P value | FDR-adjusted P value |
|-------------|-------------------------------------------------------------------------------------------|---------------------------|---------|----------------------|
| GLEAN_02081 | hypothetical protein                                                                      | 6.65                      | 0.0000  | 0.0015               |
| GLEAN_14157 | similar to inter-alpha (globulin) inhibitor H4 (plasma Kallikrein-sensitive glycoprotein) | 6.64                      | 0.0000  | 0.0015               |
| GLEAN_08826 | hypothetical protein                                                                      | 6.58                      | 0.0001  | 0.0182               |
| GLEAN_11075 | Leucine-rich repeat (LRR) protein                                                         | 6.17                      | 0.0001  | 0.0182               |
| GLEAN_07911 | similar to Glycine N-methyltransferase                                                    | 6.05                      | 0.0000  | 0.0087               |
| GLEAN_09457 | Leucine-rich repeat (LRR) protein                                                         | 5.81                      | 0.0000  | 0.0067               |
| GLEAN_06255 | serpin peptidase inhibitor 24                                                             | 5.79                      | 0.0002  | 0.0348               |
| GLEAN_15180 | Haemolymph juvenile hormone binding protein like                                          | 5.75                      | 0.0002  | 0.0366               |
| GLEAN_14314 | leucine-rich repeat receptor-like protein kinase XP_966329.1                              | 5.69                      | 0.0003  | 0.0474               |
| GLEAN_15436 | Major Facilitator Superfamily Transporter                                                 | 5.67                      | 0.0002  | 0.0280               |
| GLEAN_09551 | arrestin 2                                                                                | 5.64                      | 0.0001  | 0.0182               |
| GLEAN_15572 | similar to Inter-alpha-trypsin inhibitor heavy chain H45.61 precursor                     | 5.61                      | 0.0001  | 0.0228               |
| GLEAN_08483 | hypothetical protein                                                                      | 5.46                      | 0.0001  | 0.0142               |
| GLEAN_10766 | similar to dual specificity phosphatase 10                                                | 5.40                      | 0.0002  | 0.0407               |
| GLEAN_15379 | putative fatty acyl-CoA reductase CG5065-like                                             | 5.35                      | 0.0001  | 0.0255               |
| GLEAN_09696 | putative Esterase                                                                         | 5.24                      | 0.0001  | 0.0182               |
| GLEAN_08299 | hypothetical protein                                                                      | 5.08                      | 0.0002  | 0.0308               |
| GLEAN_04438 | toll-like Receptor, Toll3                                                                 | 5.03                      | 0.0001  | 0.0182               |
| GLEAN_08275 | Leucine-rich repeat (LRR) protein                                                         | 5.01                      | 0.0001  | 0.0255               |
| GLEAN_16355 | similar to glucose dehydrogenase                                                          | 4.93                      | 0.0001  | 0.0221               |
| GLEAN_03797 | similar to Multi drug resistance 50 CG8523-PA                                             | 4.90                      | 0.0001  | 0.0221               |
| GLEAN_07869 | serpin peptidase inhibitor 26                                                             | 4.78                      | 0.0001  | 0.0258               |
| GLEAN_06454 | similar to lysosomal alpha-mannosidase                                                    | 4.29                      | 0.0003  | 0.0494               |
| GLEAN_03391 | pleiotrophin-like protein                                                                 | 0.17                      | 0.0001  | 0.0202               |
| GLEAN_15266 | putative esterase                                                                         | 0.14                      | 0.0000  | 0.0088               |
| GLEAN_13657 | haemolymph juvenile hormone binding protein like                                          | 0.13                      | 0.0002  | 0.0366               |

doi:10.1371/journal.pone.0052004.t003

whereas PGRP-LE is an intracellular receptor capable of binding bacteria in the cytoplasm [4].

Gram negative bacteria binding proteins (GNBP) comprises a family of proteins, also known as  $\beta$ -1,3-glucan binding proteins ( $\beta$ GBP) and  $\beta$ -1,3-glucan recognition proteins ( $\beta$ GRP). The first  $\beta$ -1,3-glucan recognition protein was purified from the hemolymph of the silkworm *Bombyx mori* with a strong affinity for gram negative bacteria [34]. This GNBP contained a region with significant sequence homology to the catalytic region of a group of bacterial  $\beta$ -1,3-glucanases. In *Drosophila*, three GNBP paralogs (GNBP1, GNBP2 and GNBP3) are known, which only GNBP3 (CG13422) is immune-responsive upon septic injury [4]. GNBP1 is required for Toll activation in response to gram positive bacterial infection whereas GNBP3 has been reported to sense fungal infections [4]. The biological function of *Drosophila* GNBP2 has yet not been determined. In *Tribolium*, we found up regulation of  $\beta$ GRP3 but not of  $\beta$ GRP1 and  $\beta$ GRP2 upon LPS-challenge, which resembles observations from *Drosophila*.

Thioester-containing proteins (TEPs) are a further group of bacteria-binding proteins, which function as both opsonins and protease inhibitors [4,5]. In *Drosophila*, TEP II and TEP IV of in total 6 paralogous TEPs were found to be induced upon septic injury [6]. In *T. castaneum* only 4 TEPs are traceable in the whole

genome sequence and in this study, we found that mRNA levels of *Tribolium* TEP-B and C were increased but not of TEP-A and D upon immune-challenge. Interestingly, no clear orthologs can be assigned between dipteran and coleopteran TEPs, except for *Tribolium* TEP-A, which is orthologous to *Drosophila* TEP-VI [11]. Finally, a putative TEP/complement-binding receptor-like protein (LpR2) was shown to be immune-inducible in *Drosophila* but failed to exhibit significant difference in gene expression rates in *Tribolium* in our approach.

### Immunity related signaling

In insects, major immune-related signaling pathways include Toll, IMD, JAK-STAT, and JNK pathways [4]. Mammalian Toll-like receptors are capable of directly binding danger (e.g. extracellular nucleic acids or uric acid) or pathogen-derived molecules (e.g. LPS) while *Drosophila* Toll is instead activated by a proteolytically activated cytokine-like molecule spaetzle 1. In *D. melanogaster* spaetzle 1 is immune-responsive [6] and five further paralogs have been described (spaetzle 2–6) with yet unknown functions. In *Tribolium*, 7 spaetzle paralogs exist with spaetzle 3, 4, 5, and 6 representing orthologs to respective *Drosophila* spaetzle isoforms. However, no *Tribolium* ortholog of *Drosophila* spaetzle 2 can be found and spaetzle 1, 2 and 7 in *Tribolium* form a clade

**Table 4.** Expression levels of immune-related genes in adult beetles.

| Glean number           | Description | log <sub>2</sub> (Control) | log <sub>2</sub> (LPS-challenge) | Fold change of expression |
|------------------------|-------------|----------------------------|----------------------------------|---------------------------|
| Microbial recognition  |             |                            |                                  |                           |
| GLEAN_02546            | PGRP-LD     | 3.5850                     | 3.1699                           | same*                     |
| GLEAN_02789            | PGRP-LA     | 5.8580                     | 6.5699                           | 1.637 up                  |
| GLEAN_02790            | PGRP-LC     | 6.9307                     | 8.9915                           | 4.172 up                  |
| GLEAN_10508            | PGRP-LE     | 4.5236                     | 4.9542                           | same                      |
| GLEAN_10611            | PGRP-SA     | 3.5850                     | 4.9542                           | 2.583 up                  |
| GLEAN_13620            | PGRP-SB     | no hit                     | 5.169925                         | n.d.                      |
| GLEAN_15689            | PGRP-LB     | 4.3923                     | 5.4919                           | 2.142 up                  |
| GLEAN_02295            | βGRP1       | 8.0928                     | 8.6036                           | same                      |
| GLEAN_11529            | βGRP2       | 8.5584                     | 8.4346                           | same                      |
| GLEAN_03991            | βGRP3       | 6.2668                     | 8.0499                           | 3.441 up                  |
| GLEAN_14664            | TEP-B       | 7.8074                     | 9.0553                           | 2.375 up                  |
| GLEAN_09667            | TEP-C       | 6.9425                     | 7.6935                           | 1.682 up                  |
| GLEAN_09375            | TEP-A       | 9.5565                     | 9.3152                           | same                      |
| GLEAN_00808            | TEP-D       | 6.9425                     | 6.5078                           | same                      |
| GLEAN_01981            | LpR2        | 9.8471                     | 10.0954                          | same                      |
| Toll-signaling pathway |             |                            |                                  |                           |
| GLEAN_00520            | spz1        | 5.7004                     | 4.9542                           | 1.677 down                |
| GLEAN_01053            | spz7        | 1.0000                     | 3.3219                           | 5.000 up                  |
| GLEAN_01054            | spz2        | 4.4594                     | 5.3219                           | 1.818 up                  |
| GLEAN_05940            | spz3        | 7.2095                     | 6.9542                           | same                      |
| GLEAN_06726            | spz4        | no hit                     | no hit                           | n.d.                      |
| GLEAN_13304            | spz5        | 3.5850                     | 2.5850                           | 2.000 down                |
| GLEAN_16368            | spz6        | 4.6439                     | 3.8074                           | 1.785 down                |
| GLEAN_00625            | Toll9       | no hit                     | 0                                | n.d.                      |
| GLEAN_00176            | Toll1       | 5.5850                     | 6.3219                           | 1.666 up                  |
| GLEAN_04438            | Toll3       | 8.8486                     | 11.2003                          | 5.104 up                  |
| GLEAN_04439            | Toll4       | 6.7279                     | 8.7381                           | 4.028 up                  |
| GLEAN_04452            | Toll2       | 7.4179                     | 8.3487                           | 1.906 up                  |
| GLEAN_04474            | Toll7       | 7.3923                     | 7.5622                           | same                      |
| GLEAN_04895            | Toll6       | 5.3923                     | 4.0875                           | 2.470 down                |
| GLEAN_04898            | Toll8       | 3.3219                     | 4.0875                           | 1.700 up                  |
| GLEAN_04901            | Toll10      | 3.5850                     | 3.0000                           | same                      |
| GLEAN_03185            | Myd88       | 7.6865                     | 8.5812                           | 1.859 up                  |
| GLEAN_11895            | Tube        | 8.3443                     | 8.4878                           | same                      |
| GLEAN_15365            | pelle       | 6.5078                     | 7.2095                           | 1.626 up                  |
| GLEAN_02003            | cactus      | 9.1649                     | 9.7566                           | 1.506 up                  |
| GLEAN_09672            | pellino     | 9.9009                     | 9.5981                           | same                      |
| GLEAN_07706            | Traf        | 7.4757                     | 7.8138                           | same                      |
| GLEAN_08782            | cactin      | 8.6439                     | 8.6760                           | same                      |
| GLEAN_07697            | Dif1        | 9.2854                     | 9.2738                           | same                      |
| GLEAN_08096            | Dif2        | 5.8329                     | 6.5850                           | 1.684 up                  |
| IMD-signaling pathway  |             |                            |                                  |                           |
| GLEAN_10851            | IMD         | 4.6439                     | 6.1699                           | 2.880 up                  |
| GLEAN_14042            | FADD        | 5.2854                     | 5.3923                           | same                      |
| GLEAN_00068            | Dredd       | 4.4594                     | 5.7004                           | 2.363 up                  |
| GLEAN_05572            | TAK1        | 8.8518                     | 8.2668                           | same                      |
| GLEAN_01419            | IKKb        | 7.0000                     | 7.7279                           | 1.656 up                  |
| GLEAN_09798            | IKKb        | 11.0934                    | 11.5018                          | same                      |



Table 4. Cont.

| Glean number                           | Description | log2 (Control) | log2 (LPS-challenge) | Fold change of expression |
|----------------------------------------|-------------|----------------|----------------------|---------------------------|
| GLEAN_00541                            | IKKg        | 9.2288         | 9.8345               | 1.521 up                  |
| GLEAN_11191                            | REL1        | 9.7549         | 10.2228              | same                      |
| GLEAN_14708                            | REL2        | 10.5981        | 10.2992              | same                      |
| GLEAN_01189                            | IAP2        | 7.8887         | 7.8202               | same                      |
| GLEAN_01192                            | IAP1        | 9.1085         | 10.5708              | 2.755 up                  |
| GLEAN_09848                            | IAP3        | 9.8281         | 9.6653               | same                      |
| GLEAN_02709                            | IAP4        | 3.1699         | 3.5850               | same                      |
| JAK/STAT-signaling pathway             |             |                |                      |                           |
| GLEAN_01874                            | domeless    | 9.59246        | 10.1762              | same                      |
| GLEAN_13218                            | STAT92E     | 10.6909        | 10.3487              | same                      |
| GLEAN_08648                            | hopscotch   | 7.2668         | 7.0980               | same                      |
| JNK-signaling pathway                  |             |                |                      |                           |
| GLEAN_00385                            | hemipterous | 6.2479         | 6.9887               | 1.671 up                  |
| GLEAN_06810                            | basket      | 8.4959         | 8.8642               | same                      |
| GLEAN_06814                            | D-Jun       | 7.7279         | 8.7549               | 2.037 up                  |
| GLEAN_10766                            | Puckered    | 6.3576         | 8.8106               | 5.475 up                  |
| Effector molecules                     |             |                |                      |                           |
| GLEAN_07737                            | attacin1    | 0.0000         | 4.3219               | 20.000 up                 |
| GLEAN_07738                            | attacin2    | 0.0000         | 4.7549               | 27.000 up                 |
| GLEAN_07739                            | attacin3    | no hit         | 0                    | n.d.                      |
| GLEAN_06250                            | defensin1   | no hit         | 2.3219               | n.d.                      |
| GLEAN_10517                            | defensin2   | 0.0000         | 3.8074               | 14.000 up                 |
| GLEAN_12469                            | defensin3   | no hit         | no hit               | n.d.                      |
| GLEAN_00517                            | thaumatin1  | 5.0875         | 9.1898               | 17.176 up                 |
| GLEAN_11564                            | thaumatin2  | 5.7004         | 5.2479               | same                      |
| GLEAN_00515                            | thaumatin3  | 8.1241         | 7.7279               | same                      |
| GLEAN_00516                            | thaumatin4  | 4.8580         | 3.5850               | 2.416 down                |
| GLEAN_00518                            | thaumatin5  | no hit         | 0                    | n.d.                      |
| GLEAN_10349                            | lysozyme1   | 3.3219         | no hit               | n.d.                      |
| GLEAN_10350                            | lysozyme2   | 0.0000         | 2.3219               | 5.000 up                  |
| GLEAN_10351                            | lysozyme3   | 2.8074         | 4.8580               | 4.142 up                  |
| GLEAN_10352                            | lysozyme4   | 5.0444         | 6.1293               | 2.121 up                  |
| Stress-related immune-responsive genes |             |                |                      |                           |
| GLEAN_15563                            | apoD        | 6.4919         | 9.6366               | 8.844 up                  |
| GLEAN_10172                            | Hsp68       | 4.9069         | 10.5934              | 51.500 up                 |
| GLEAN_05338                            | Hsp27       | 1.5850         | 7.0000               | 42.666 up                 |

n.d., not determinable;

\*same, genes with expression difference less than 1.5 fold.

doi:10.1371/journal.pone.0052004.t004

together with the single, immune-responsive *Drosophila* spaetzle 1 [11]. Here, we found that *Tribolium* spaetzle 2 and 7 are immune-inducible, whereas spaetzle 1 was immune-repressed.

Similarly to their potential ligands, also Toll-like receptors have experienced lineage-specific gene duplications in beetles as well as in flies or mosquitoes [11]. 4 *Tribolium* Toll-like receptors (1 to 4) of in total 10 paralogs were described to form a clade with the single, immune-responsive *Drosophila* Toll receptor of the in total 9 *Drosophila* Toll-like receptors [11]. Here, we observed that these *Tribolium* Toll-like receptors 1 to 4 were induced in their gene expression upon LPS-challenge similar to the *Drosophila* Toll

receptor upon septic injury [6]. In addition, *Tribolium* Toll6 was over 2-fold down-regulated whereas Toll8 was slightly upregulated. Taken together, these results support the hypothesis that *Tribolium* has a more complex immune-related Toll signaling than *Drosophila*, since both a higher number of immune-responsive Toll-like receptors and of spaetzle ligands exist in *Tribolium* than in *Drosophila*.

Regarding further immune-related signaling pathways, we found 2 to 5 fold induced expression of several signaling proteins involved in IMD and JNK pathways such as IMD and D-Jun, respectively, which is in agreement to observations from *Drosophila*

[6]. Also in agreement with observations in *Drosophila* [6], we found that expression rates of JAK-STAT pathway genes were not significantly influenced by LPS-challenge in *Tribolium*.

### Antimicrobial peptides

As expected, we identified genes encoding antimicrobial peptides such as defensins, attacins and thaumatin among the systemically most septic injury inducible genes with up to 10 to 30 fold higher expression rates in LPS-challenged animals than in naive ones. This is in agreement with observations from diverse immune-challenged invertebrates [6,7,9,35–37].

### Stress response genes

Recently, we determined induced expression of genes in *T. castaneum* involved in detoxification and stress adaptation such as apolipoprotein D, cytochrome P450, glutathione S-transferase, and a number of heat shock proteins [12]. In line with these observations, here we found elevated gene expression rates of a number of stress and detoxification genes upon LPS-challenge including most notable HSPs, CytP450s (e.g. 6BQ7, 345D2, 6BQ12, 6BK5), GST, ApoD, and ABC transporters (Table 3). This supports our recent hypothesis that interdependencies between immune and stress responses exist in *T. castaneum* [12,38].

It should be noted here that wounding itself can lead to gene expression alterations in insects triggered by e.g. cryptic, endogenous danger signals such as nucleic acids or collagen fragments [39,40]. Moreover, the presently used LPS preparation is known to include bacterial nucleic acids and peptidoglycans, which may be responsible for the induction of e.g. PGRPs and PGRP-controlled genes. Hence, in follow-up studies we propose to investigate transcriptomic immune responses from beetles with varying treatments such as feeding and stabbing with different elicitors and pathogens of diverse phylogenetic origin and much more time points of samples derived from whole animals, specific organs, tissues or cell types. In addition, different *T. castaneum* genotypes, sexes or developmental stages are likely to vary in their immune investment and hence may show altered gene expression upon immune-challenge, particularly in the context of diverse environmental cues and stresses.

### Conclusions

The beetle immune response underlies the differential expression of a wide array of different genes. Here we describe differential expression of numerous immune-related genes as well as several genes encoding proteins with leucine-rich-repeat domains, which might function as receptors in specific immune recognition and signaling reactions in beetles maybe in a similar way as leucine-rich-repeat domain containing receptors in ancient

jawless vertebrates [41]. While insect immune defense mechanisms had generally been assumed to be non-specific, diverse insects including the red flour beetle *T. castaneum* have recently been shown to respond quite specifically to some pathogens [42–45]. Presently identified genes may help to elucidate the molecular basis of such specific reactions. This study is the first whole transcriptome analysis of the complex gene expression response in *T. castaneum* upon septic injury and provides numerous candidate genes that we can use as a starting point for further studies on beetle immunity.

### Supporting Information

**Data S1** *De novo* assembly of Illumina reads.  
(ZIP)

**Figure S1** Quality score boxplot drawing of the Illumina sequencing reads.  
(PDF)

**Table S1** List of high-quality SNPs and DIPs within the coding gene sequences between the *T. castaneum* strain San Bernardino used in the present analysis and the genome-sequenced strain Georgia GA-2.  
(CSV)

**Table S2** DESeq analysis of transcriptome sequencing analysis derived by fitting normalized count data with a generalized linear model (GLM) estimating a negative binomial distribution to the calculated mean values of the two biologically independent samples, fold changes and respective P values (pval) as well as P values adjusted (padj) for multiple testing with the Benjamini-Hochberg procedure, which controls false discovery rate (FDR).  
(TXT)

**Table S3** Blast2go annotation of predicted genes (gleans) to assign the potential functions of identified genes.  
(XLSX)

### Acknowledgments

We thank Gregor Bucher (Georg August University of Göttingen, Germany) for kindly providing us with the *Tribolium* beetle stock.

### Author Contributions

Coordinated the study: BA. Performed experimental work: BA. Performed SNPs and DIPs analysis: AE FG. Participated in study design: NG AE FG AV HWD. Interpreted data: NG AE FG AV HWD. Assisted with manuscript writing: NG AE FG AV HWD. Read and approved the final version of the manuscript: BA AE NG FG AV HWD. Analyzed the data: BA. Wrote the paper: BA.

### References

- Parker BJ, Barribeau SM, Laughton AM, de Roode JC, Gerardo NM (2011) Non-immunological defense in an evolutionary framework. *Trends in Ecology & Evolution* 26: 242–248.
- Akira S, Uematsu S, Takeuchi O (2006) Pathogen recognition and innate immunity. *Cell* 124: 783–801.
- Beutler B, Jiang ZF, Georgel P, Crozat K, Croker B, et al. (2006) Genetic analysis of host resistance: Toll-like receptor signaling and immunity at large. *Annual Review of Immunology* 24: 353–389.
- Lemaitre B, Hoffmann J (2007) The host defense of *Drosophila melanogaster*. *Annual Review of Immunology* 25: 697–743.
- Jiravanichpaisal P, Lee BL, Soderhall K (2006) Cell-mediated immunity in arthropods: Hematopoiesis, coagulation, melanization and opsonization. *Immunobiology* 211: 213–236.
- De Gregorio E, Spellman PT, Rubin GM, Lemaitre B (2001) Genome-wide analysis of the *Drosophila* immune response by using oligonucleotide microarrays. *Proceedings of the National Academy of Sciences of the United States of America* 98: 12590–12595.
- Irving P, Troxler L, Heuer TS, Belvin M, Kocczynski C, et al. (2001) A genome-wide analysis of immune responses in *Drosophila*. *Proceedings of the National Academy of Sciences of the United States of America* 98: 15119–15124.
- Johansson KC, Metzendorf C, Soderhall K (2005) Microarray analysis of immune challenged *Drosophila* hemocytes. *Experimental Cell Research* 305: 145–155.
- Roxstrom-Lindquist K, Terenius O, Faye I (2004) Parasite-specific immune response in adult *Drosophila melanogaster*: a genomic study. *Embo Reports* 5: 207–212.
- Richards S, Gibbs RA, Weinstock GM, Brown SJ, Denell R, et al. (2008) The genome of the model beetle and pest *Tribolium castaneum*. *Nature* 452: 949–955.
- Zou Z, Evans JD, Lu ZQ, Zhao PC, Williams M, et al. (2007) Comparative genomic analysis of the *Tribolium* immune system. *Genome Biology* 8.

12. Altıncicek B, Knorr E, Vilcinskas A (2008) Beetle immunity: Identification of immune-inducible genes from the model insect *Tribolium castaneum*. *Developmental and Comparative Immunology* 32: 585–595.
13. Altıncicek B, Vilcinskas A (2007) Analysis of the immune-inducible transcriptome from microbial stress resistant, rat-tailed maggots of the drone fly *Eristalis tenax*. *Bmc Genomics* 8.
14. Jomori T, Natori S (1991) Molecular cloning of cDNA for lipopolysaccharide-binding protein from the hemolymph of the American cockroach, *Periplaneta americana*: similarity of the protein with animal lectins and its acute phase expression. *Journal of Biological Chemistry* 266: 13318–13323.
15. Muta T, Miyata T, Misumi Y, Tokunaga F, Nakamura T, et al. (1991) Limulus factor C. An endotoxin-sensitive serine protease zymogen with a mosaic structure of complement-like, epidermal growth factor-like, and lectin-like domains. *Journal of Biological Chemistry* 266: 6554–6561.
16. Koizumi N, Morozumi A, Imamura M, Tanaka E, Iwahana H, et al. (1997) Lipopolysaccharide-binding proteins and their involvement in the bacterial clearance from the hemolymph of the silkworm *Bombyx mori*. *European Journal of Biochemistry* 248: 217–224.
17. Ewing B, Hillier L, Wendl MC, Green P (1998) Base-calling of automated sequencer traces using phred. I. Accuracy assessment. *Genome Research* 8: 175–185.
18. *Tribolium castaneum* genome website: Available: <ftp://ftp.hgsc.bcm.tmc.edu/pub/data/Tcastaneum/Tcas3.0/>. Accessed 2012 Nov 17.
19. Anders S, Huber W (2010) Differential expression analysis for sequence count data. *Genome Biology* 11.
20. Gentleman RC, Carey VJ, Bates DM, Bolstad B, Dettling M, et al. (2004) Bioconductor: open software development for computational biology and bioinformatics. *Genome Biology* 5.
21. R project website. Available: <http://www.r-project.org/>. Accessed 2012 Nov 17.
22. Conesa A, Gotz S, Garcia-Gomez JM, Terol J, Talon M, et al. (2005) Blast2GO: a universal tool for annotation, visualization and analysis in functional genomics research. *Bioinformatics* 21: 3674–3676.
23. Beetlebase website. Available: <http://beetlebase.org/>. Accessed 2012 Nov 17.
24. Ibeetle website. Available: <http://ibeetle.uni-goettingen.de/>. Accessed 2012 Nov 17.
25. Anders S (2010) Analysing RNA-Seq data with the “DESeq” package.
26. Lemetrelab website. Available: [lemetrelab.epfl.ch/page-7767-en.html](http://lemetrelab.epfl.ch/page-7767-en.html). Accessed 2012 Nov 17.
27. Roth O, Kurtz J (2008) The stimulation of immune defence accelerates development in the red flour beetle (*Tribolium castaneum*). *Journal of Evolutionary Biology* 21: 1703–1710.
28. Pursall ER, Rolff J (2011) Immune Responses Accelerate Ageing: Proof-of-Principle in an Insect Model. *Plos One* 6.
29. Altıncicek B, Gross J, Vilcinskas A (2008) Wounding-mediated gene expression and accelerated viviparous reproduction of the pea aphid *Acyrtosiphon pisum*. *Insect Molecular Biology* 17: 711–716.
30. Evans JD, Aronstein K, Chen YP, Hetru C, Imler JL, et al. (2006) Immune pathways and defence mechanisms in honey bees *Apis mellifera*. *Insect Molecular Biology* 15: 645–656.
31. Vogel H, Altıncicek B, Glockner G, Vilcinskas A (2011) A comprehensive transcriptome and immune-gene repertoire of the lepidopteran model host *Galleria mellonella*. *Bmc Genomics* 12.
32. Short SM, Lazzaro BP (2010) Female and male genetic contributions to post-mating immune defence in female *Drosophila melanogaster*. *Proc Biol Sci* 277: 3649–3657.
33. Wang Y, Ghaffari N, Johnson CD, Braga-Neto UM, Wang H, et al. (2011) Evaluation of the coverage and depth of transcriptome by RNA-Seq in chickens. *Bmc Bioinformatics* 12.
34. Lee WJ, Lee JD, Kravchenko VV, Ulevitch RJ, Brey PT (1996) Purification and molecular cloning of an inducible Gram-negative bacteria-binding protein from the silkworm, *Bombyx mori*. *Proceedings of the National Academy of Sciences of the United States of America* 93: 7888–7893.
35. Altıncicek B, Vilcinskas A (2009) Septic injury-inducible genes in medicinal maggots of the green blow fly *Lucilia sericata*. *Insect Molecular Biology* 18: 119–125.
36. Altıncicek B, Vilcinskas A (2008) Identification of immune inducible genes from the velvet worm *Epiplatys biolleyi* (Onychophora). *Developmental and Comparative Immunology* 32: 1416–1421.
37. Altıncicek B, Vilcinskas A (2007) Identification of immune-related genes from an apterygote insect, the firebrat *Thermobia domestica*. *Insect Biochemistry and Molecular Biology* 37: 726–731.
38. Freitak D, Knorr E, Vogel H, Vilcinskas A (2012) Gender- and stressor-specific microRNA expression in *Tribolium castaneum*. *Biol Lett*.
39. Altıncicek B, Stotzel S, Wygrecka M, Preissner KT, Vilcinskas A (2008) Host-derived extracellular nucleic acids enhance innate immune responses, induce coagulation, and prolong survival upon infection in insects. *Journal of Immunology* 181: 2705–2712.
40. Altıncicek B, Berisha A, Mukherjee K, Spengler B, Rompp A, et al. (2009) Identification of collagen IV derived danger/alarm signals in insect immunity by nanoLC-FTICR MS. *Biological Chemistry* 390: 1303–1311.
41. Han BW, Herrin BR, Cooper MD, Wilson IA (2008) Antigen recognition by variable lymphocyte receptors. *Science* 321: 1834–1837.
42. Sadd BM, Schmid-Hempel P (2006) Insect immunity shows specificity in protection upon secondary pathogen exposure. *Current Biology* 16: 1206–1210.
43. Pham LN, Dionne MS, Shirasu-Hiza M, Schneider DS (2007) A specific primed immune response in *Drosophila* is dependent on phagocytes. *Plos Pathogens* 3.
44. Roth O, Sadd BM, Schmid-Hempel P, Kurtz J (2009) Strain-specific priming of resistance in the red flour beetle, *Tribolium castaneum*. *Proceedings of the Royal Society B-Biological Sciences* 276: 145–151.
45. Rodrigues J, Brayner FA, Alves LC, Dixit R, Barillas-Mury C (2010) Hemocyte Differentiation Mediates Innate Immune Memory in *Anopheles gambiae* Mosquitoes. *Science* 329: 1353–1355.
